# Supplementary material for: Modulating Golgi Stress Signaling Ameliorates Cell Morphological Phenotypes Induced by CHMP2B with Frontotemporal Dementia-Associated p.Asp148Tyr
Source: Curr Issues Mol Biol. 2024 Feb 5;46(2):1398–412. doi: 10.3390/cimb46020090 (PMC10888485; doi:10.3390/cimb46020090)
Supplement: Supplementary file 1 [file cimb-46-00090-s001.zip]

Archive with 7 entries (7 files):
- 01 Supplematnal legends.pdf
- Figure S1.tif
- Figure S2 Cortical.tif
- Figure S3 Cortical.tif
- Figure S4.tif
- Figure S5 for Figure 2.tif
- Figure S6 for Figure 3.tif
